# Supplementary material
Source: PubMed Central journal article supplement (PMC9810079)

**Supplementary Table 1: Prostate MRI imaging protocol**

|                      | 3 Plane Localizer | Small FOV T2 (3-plane)  | Small FOV Axial T1   | Small FOV Axial DWI | Whole pelvis Axial T1 Pre-Contrast | Whole pelvis Axial DWI | Small FOV Axial 3D DCE       |
|----------------------|-------------------|-------------------------|----------------------|---------------------|------------------------------------|------------------------|------------------------------|
| Pulse Sequence       | Gradient Echo     | FSE-XL/NPW, EDR, TRF    | FSE-XL/NPW, EDR, TRF | Spin Echo/EDR, EPI  | FSE-XL/NPW, EDR, TRF               | Spin Echo/EDR, EPI     | SPGR/ EDR, Fast, multi-phase |
| TR (msec)            | 4.768             | 4000.0                  | 660.0                | 8000                | 660                                | 11000                  | 3.7                          |
| TE (msec)            | 1.252             | 140.0                   | 9                    | 78                  | 9                                  | 64                     | 1.7                          |
| Flip Angle (°)       | 30                | 90                      | 90                   | -                   | 90                                 | -                      | 25                           |
| BW (Khz)             |                   | 25.00                   | 19.23                | 245                 | 20                                 | 240                    | 42                           |
| FOV (cm)             | 40                | 14                      | 14                   | 14                  | 24                                 | 38                     | 26                           |
| Slice Thickness (mm) | 5                 | 3                       | 3                    | 3                   | 6                                  | 5                      | 1.5                          |
| Spacing (mm)         | 2                 | 4                       | 4                    | 4                   | 6                                  | 5                      | 0                            |
| Frequency Direction  | Unswap            | Ax/Sg – A/P<br>Co – S/I | A/P                  | R/L                 | A/P                                | R/L                    | R/L                          |
| Matrix               | 256x128           | 256 x 224               | 256 x 224            | 128 x 96            | 256 x 192                          | 160 x 96               | 160 x 128                    |
| NEX                  | 2                 | 4.00                    | 4.00                 | 2                   | 2                                  | 2                      | 1                            |
| Echo Train Length    | 1                 | 18                      | 3                    | 1                   | 3                                  | 1                      | 1                            |

Abbreviations: FSE= fast spin echo; SPGR= spoiled gradient echo; EPI= echo-planar-imaging; NPW = no phase-wrap; TRF = Tailored radio frequency; EDR = extended dynamic range; TR= repetition time; TE= echo time; BW=bandwidths; FOV=field of view; ETL = echo train length; NEX = number of excitations; Co = coronal; Ax/Sg = axial/sagittal; A/P = anterior/posterior; R/L = right/left; S/I = superior/inferior.

**Supplementary Table 2: Gleason grade group progression status by normalized fat measurements**

| <b>Fat measurement</b>                                         | <b>Progressor</b> | <b>Non-Progressor</b> | <b>P-value</b> |
|----------------------------------------------------------------|-------------------|-----------------------|----------------|
| <b>Total calculated peri-prostatic fat volume* (mean, STD)</b> | 1.11 (0.26)       | 0.99 (0.27)           | 0.01           |
| <b>Distance from pubic symphysis to prostate* (mean,STD)</b>   | 0.048 (0.057)     | 0.046 (0.065)         | 0.88           |
| <b>Subcutaneous fat measurement* (mean, STD)</b>               | 1.02 (0.51)       | 0.99 (0.60)           | 0.78           |

Supplementary Figure 1: Kaplan-Meier analysis of Gleason grade group survival by normalized pubic symphysis-based peri-prostatic fat measurement

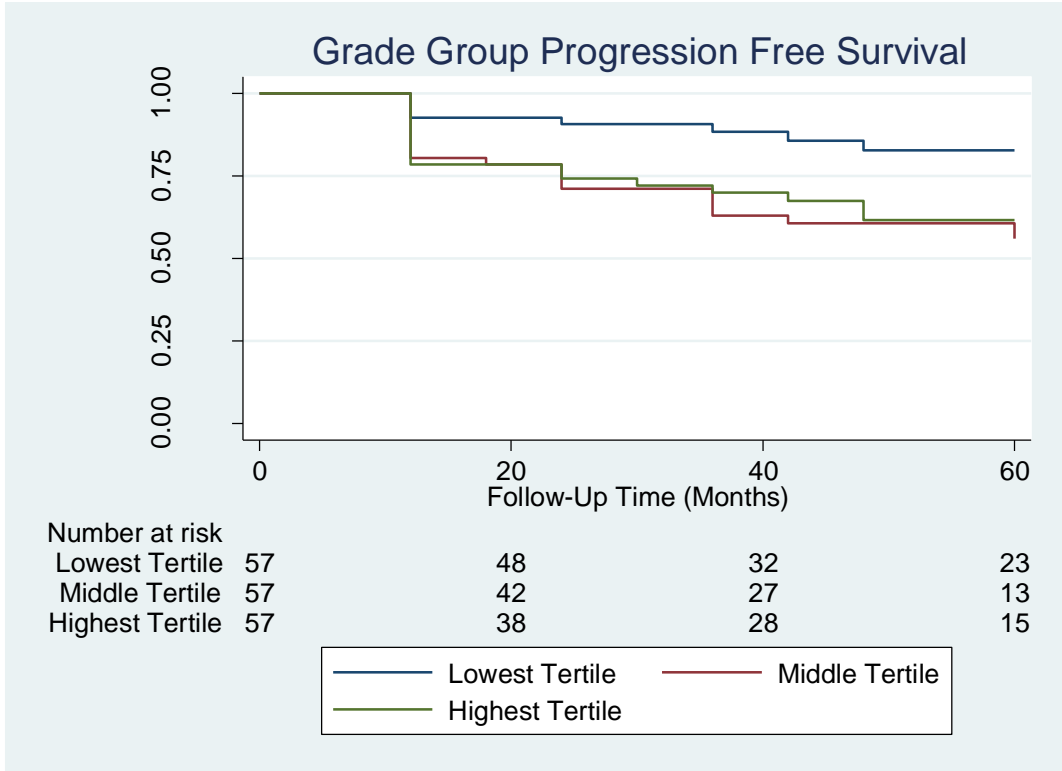

Supplementary Figure 2: Kaplan-Meier analysis of Gleason grade group survival by normalized subcutaneous fat measurement

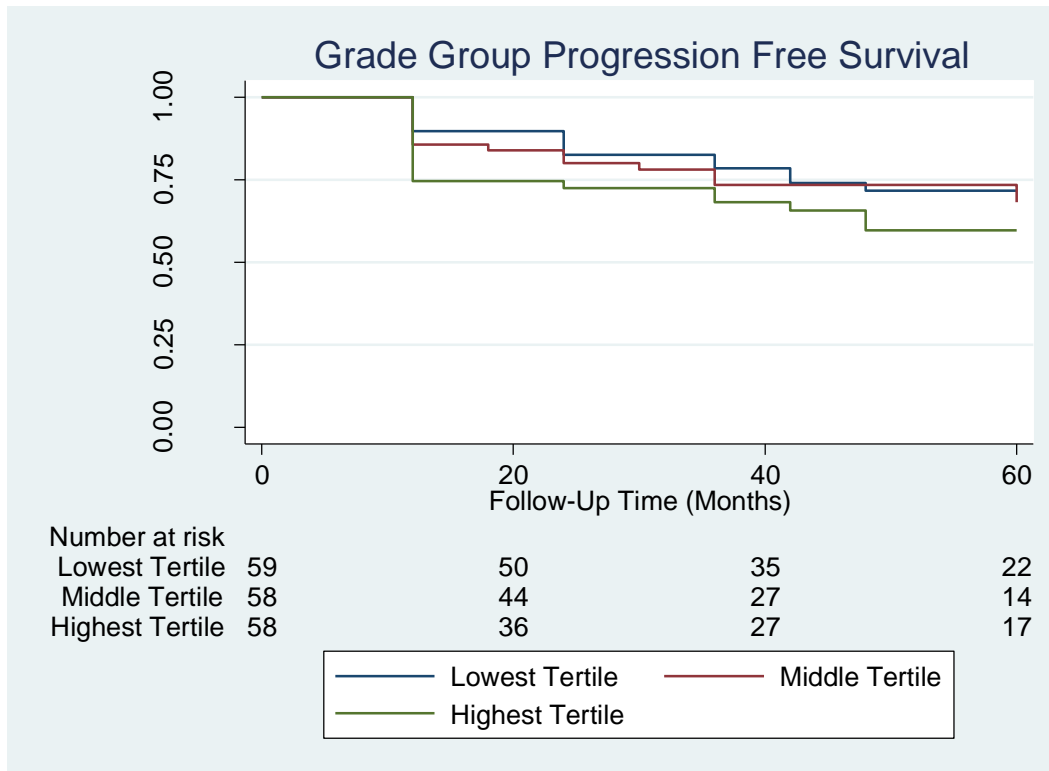

Supplement: NIHMS1856580-supplement-1.pdf [file NIHMS1856580-supplement-1.pdf]
